# Supplementary material for: Selective Separation of Rare Earth Ions from Mine Wastewater Using Synthetic Hematite Nanoparticles from Natural Pyrite
Source: MDPI journal article supplement (doi:10.3390/min14050464), 2024-04-28
Supplement: s1 [file s1]

Supporting Information Content

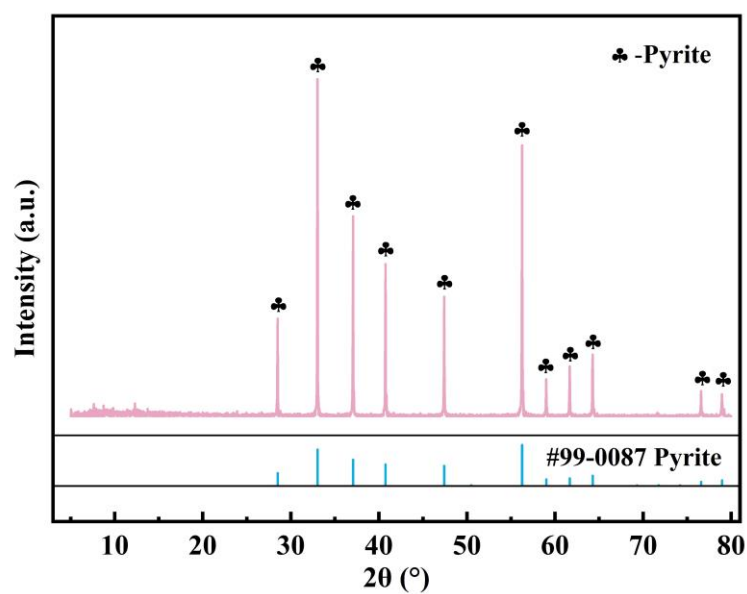

Figure S1. XRD pattern of pyrite.

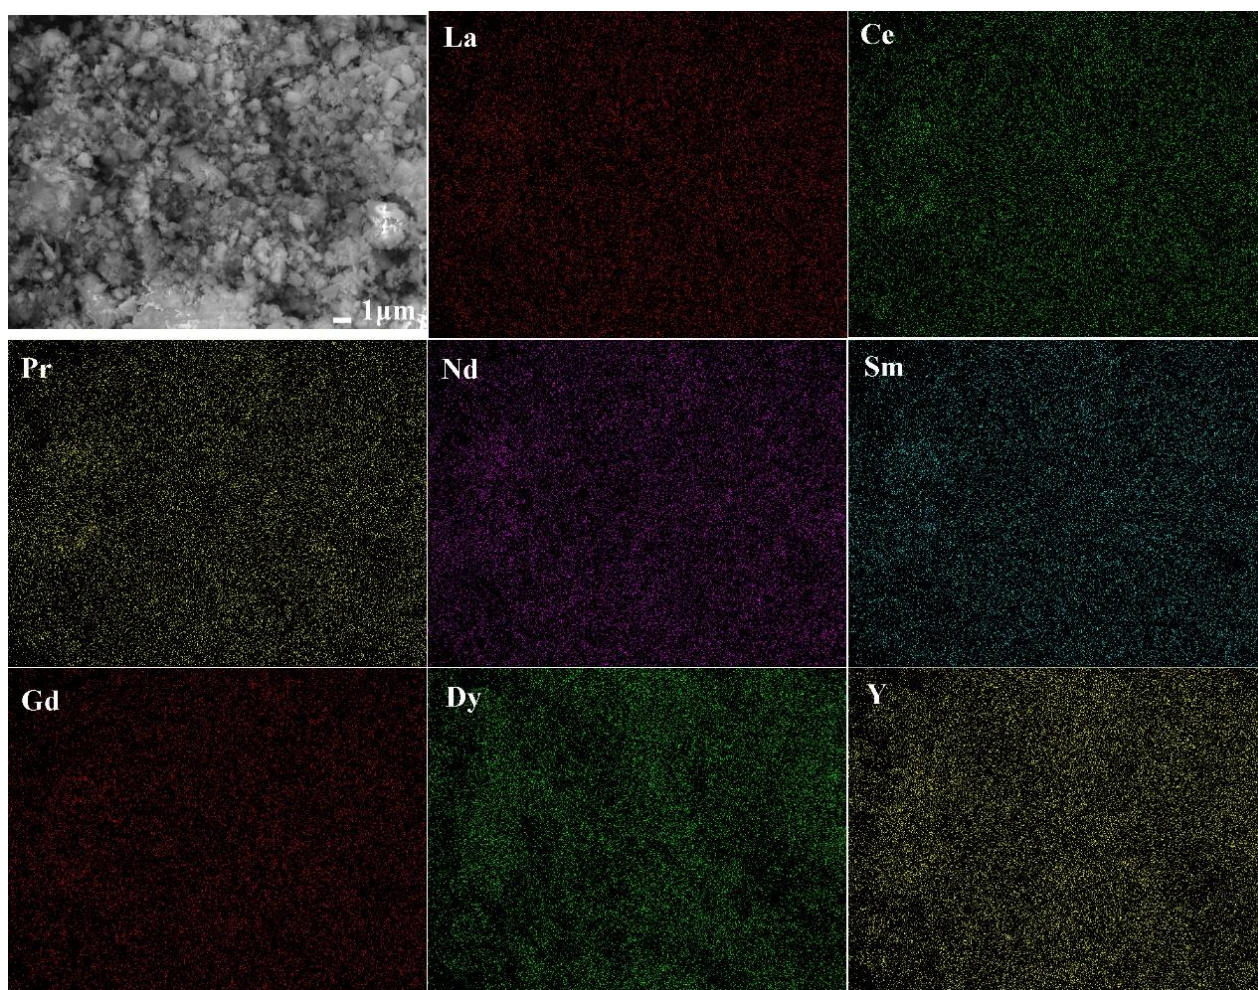

Figure S2. SEM-Mapping images of Fe<sub>2</sub>O<sub>3</sub> NPs after adsorption of RE<sup>3+</sup>.

**Table S1.** Different levels and factors of the orthogonal experiments on the grinding process of pyrite.

| Levels | Factors                    |                         |                      |
|--------|----------------------------|-------------------------|----------------------|
|        | Ball-to-Material Ratio (A) | Rotation Speed, rpm (B) | Grinding Time, h (C) |
| 1      | 10:1                       | 400                     | 1                    |
| 2      | 15:1                       | 500                     | 2                    |
| 3      | 20:1                       | 600                     | 3                    |

**Table S2.** Parameters of the orthogonal experiments on the grinding process of pyrite.

| Test | Parameters                 |                         |                      |
|------|----------------------------|-------------------------|----------------------|
|      | Ball-to-Material Ratio (A) | Rotation Speed, rpm (B) | Grinding Time, h (C) |
| 1    | A1                         | B1                      | C1                   |
| 2    | A1                         | B2                      | C2                   |
| 3    | A1                         | B3                      | C3                   |
| 4    | A2                         | B1                      | C2                   |
| 5    | A2                         | B2                      | C3                   |
| 6    | A2                         | B3                      | C1                   |
| 7    | A3                         | B1                      | C3                   |
| 8    | A3                         | B2                      | C1                   |
| 9    | A3                         | B3                      | C2                   |
